# Supplementary material
Source: PubMed Central journal article supplement (PMC3684390)

1 **Supplemental Figure 1** Progression of ileitis in TNFΔARE mice from 4- to 20-weeks-of-age.

2  
3  
4 (A) Inflammatory indices from ilea of 4-, 8- and 20-week-old TNFΔARE<sup>+/-</sup> mice (Mean ± SEM n=12-  
5  
6 20). (B) Representative micrographs of ilea at indicated ages; (H&E, 10x magnification,  
7  
8 bars=100μm).  
9

10  
11  
12 **Supplemental Figure 2** Partial deficiency of CX<sub>3</sub>CR1 did not alter the severity of ileitis.

13  
14 (A) Inflammatory indices from ilea of 20-week-old TNFΔARE/CX<sub>3</sub>CR1<sup>+/+</sup> and  
15  
16 TNFΔARE/CX<sub>3</sub>CR1<sup>GFP/+</sup> mice (Mean ± SEM n=9, 6). (B) Representative micrographs; (H&E, 10x  
17  
18 magnification, bars=100μm).  
19  
20

21  
22  
23 **Supplemental Figure 3** Increased CX<sub>3</sub>CR1 mRNA transcripts in ilea of TNFΔARE mice.

24  
25 Analysis of CX<sub>3</sub>CR1 mRNA transcripts from 4- and 20-week-old WT and TNFΔARE ileal whole  
26  
27 tissues Mean ± SEM, for n=6, \*p<0.05).  
28  
29

30  
31  
32 **Supplemental Figure 4** Inclusion of F4/80<sup>+</sup> leukocytes did not alter the ratio of CX<sub>3</sub>CR1<sup>+</sup> and  
33  
34 CD103<sup>+</sup> mononuclear phagocytes in chronic ileitis.

35  
36 The proportion of CD103<sup>+</sup> and CX<sub>3</sub>CR1<sup>+</sup> cells, without exclusion of F4/80<sup>+</sup> cells, were assessed by  
37  
38 flow cytometry from the LP of TNFΔARE/CX<sub>3</sub>CR1<sup>GFP/+</sup> and WT/CX<sub>3</sub>CR1<sup>GFP/+</sup> mice at 20-weeks-of-  
39  
40 age compared with WT age-matched control mice. (Mean ± SEM, n=4, \*p<0.05, \*\*p<0.01).  
41  
42  
43  
44

45  
46 **Supplemental Figure 5** Most CD11c<sup>+</sup>/CD11b<sup>+</sup> mononuclear phagocytes express CX<sub>3</sub>CR1 in WT  
47  
48 and TNFΔARE/CX<sub>3</sub>CR1<sup>GFP/+</sup> mice.

49  
50 The fraction of CX<sub>3</sub>CR1<sup>+</sup> cells was analyzed by flow cytometry within the CD11c<sup>+</sup>/CD11b<sup>+</sup> MP  
51  
52 subset. Representative zebra plots and histograms.  
53  
54

55  
56 **Supplemental Figure 6** CD103<sup>+</sup> DC express higher levels of RA synthetic enzymes.  
57  
58  
59  
60

1 Analysis of RALDH2 mRNA transcripts from isolated CD11c<sup>+</sup>/MHCII<sup>+</sup> CD103<sup>+</sup> and CD103<sup>Neg</sup> MP  
2 from the MLN and LP of 20-week-old mice using GAPDH as an endogenous control (Mean ± SEM,  
3 n=6, \*p<0.05).  
4  
5  
6  
7

8  
9  
10 **Supplemental Figure 7** Effect of Flt3-L administration on RALDH2 and CX<sub>3</sub>CR1 mRNA transcripts  
11 in terminal ilea of TNFΔARE mice.  
12

13 Analysis of RALDH2 and CX<sub>3</sub>CR1 mRNA transcripts from whole ileal LP of 20-week-old TNFΔARE  
14 mice treated with vehicle or Flt3-L using GAPDH as an endogenous control (Mean ± SEM, n=6,  
15 \*p<0.05).  
16  
17  
18  
19  
20

21  
22  
23 **Supplemental Figure 8** Effect of Flt3-L administration on the frequency of E-cadherin<sup>+</sup> DC isolated  
24 from terminal ilea of TNFΔARE mice.  
25

26 (A) Quantification of CD11c<sup>Hi</sup>/MHCII<sup>+</sup>/E-cadherin<sup>+</sup> DC from ileal LP of 20-week-old WT and  
27 TNFΔARE mice treated with vehicle or Flt3-L (Mean ± SEM, n=4, \*p<0.05, \*\*\*p<0.001). (B)  
28 Representative overlaid histograms of the expression of E-cadherin on CD11c<sup>Hi</sup>/MHCII<sup>+</sup> cells from  
29 the ileal lamina propria of 20-week-old mice. White histogram indicates WT cells, grey histogram  
30 represents vehicle-treated TNFΔARE mice and hatched histogram reflects expression in TNFΔARE  
31 mice after treatment with Flt3-L.  
32  
33  
34  
35  
36  
37  
38  
39  
40  
41  
42

43 **Supplemental Figure 9** Effect of Anti-CD25 antibody administration on Flt3-L mediated attenuation  
44 of ileitis.  
45

46 Inflammatory indices from ilea of 20-week-old TNFΔARE mice treated with vehicle, Flt3-L or anti-  
47 CD25 antibody + Flt3-L were assessed as described[55] (Mean ± SEM, \*\*p<0.01, \*p<0.05,  
48 n=5/treatment group).  
49  
50  
51  
52  
53  
54  
55  
56  
57  
58  
59  
60

Figure S1.

**A**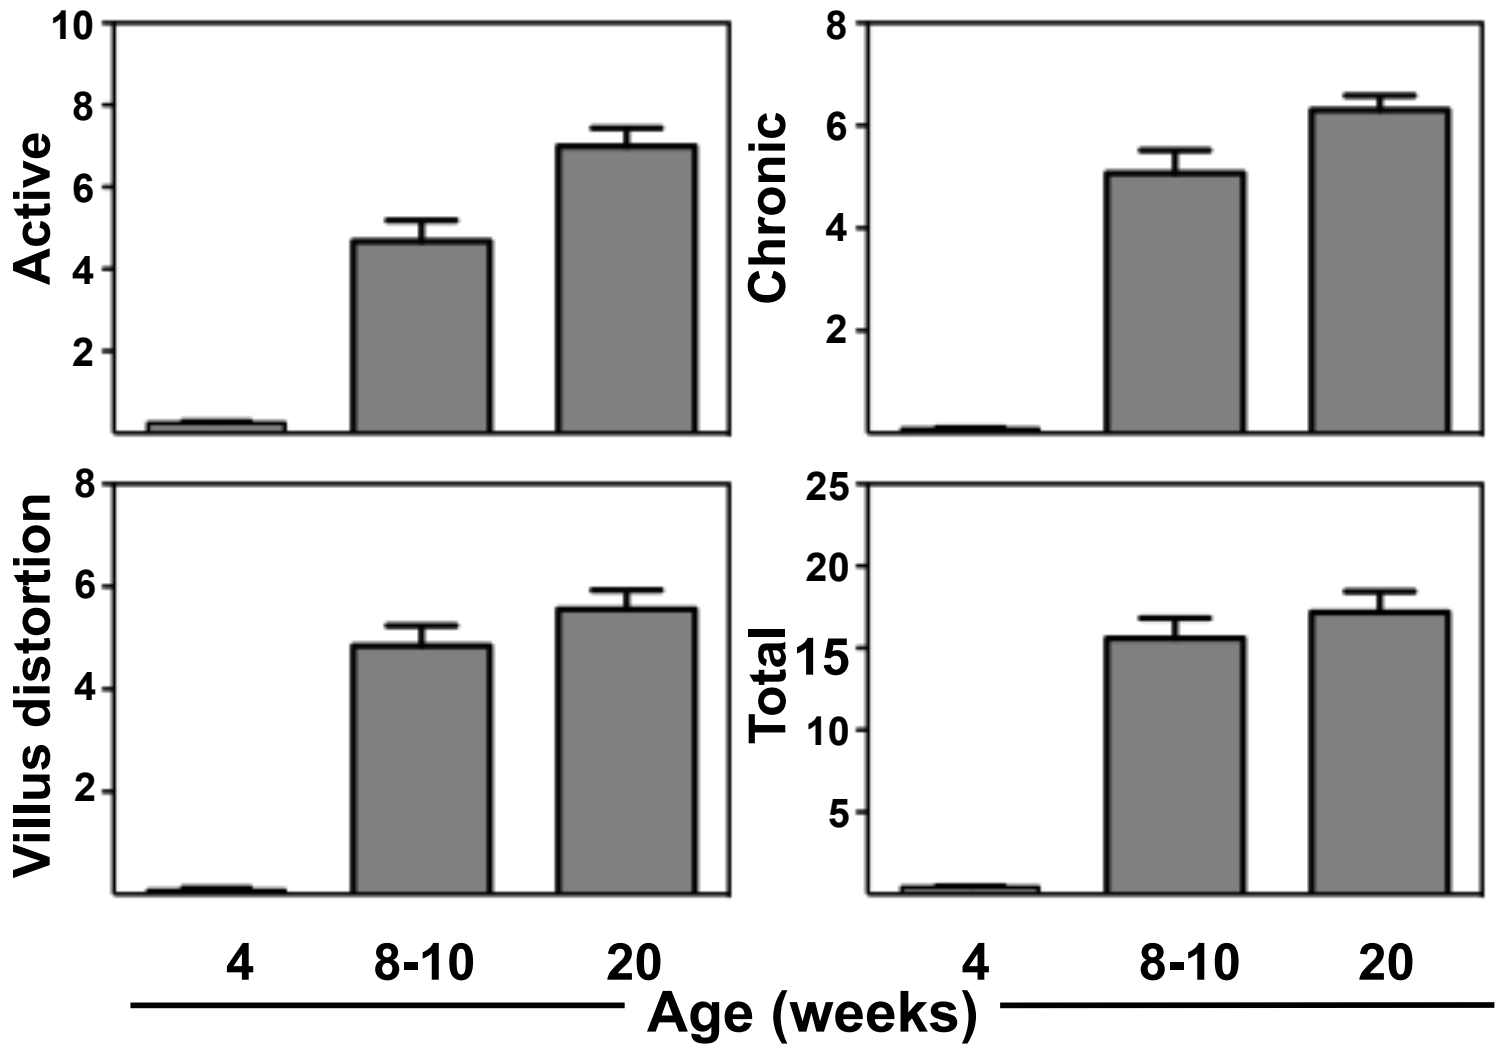**B**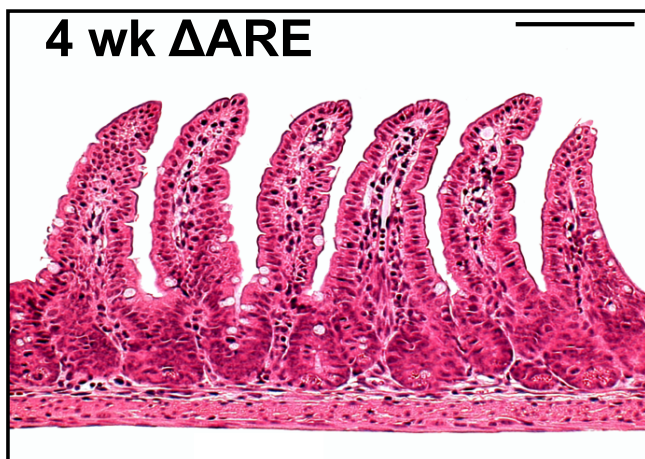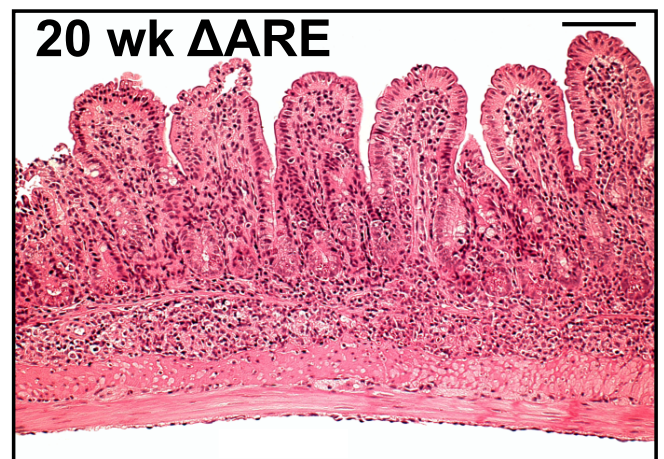

# Figure S2.

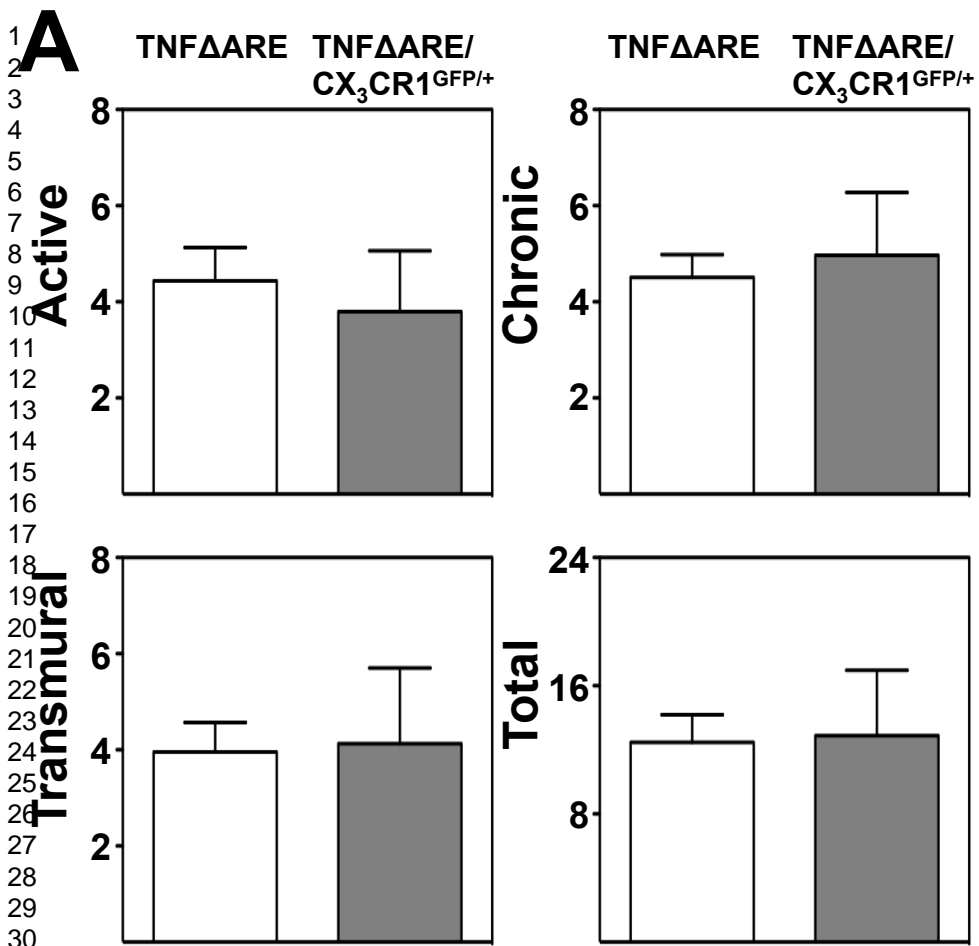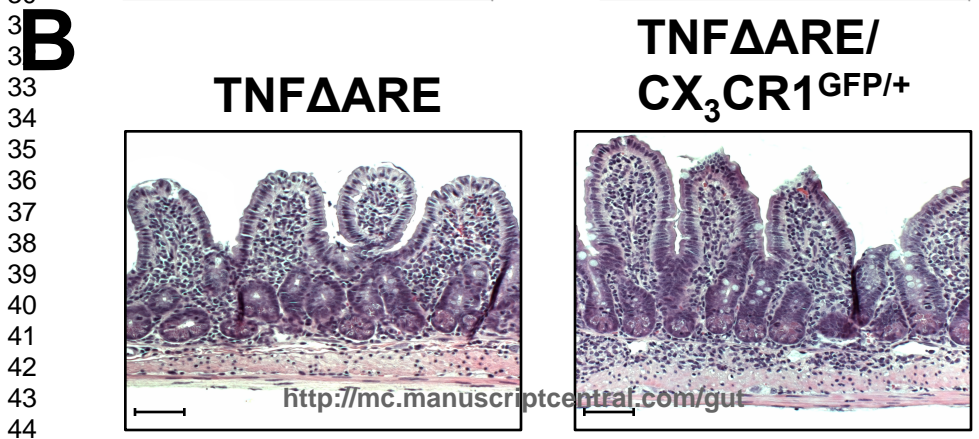

Figure S3.

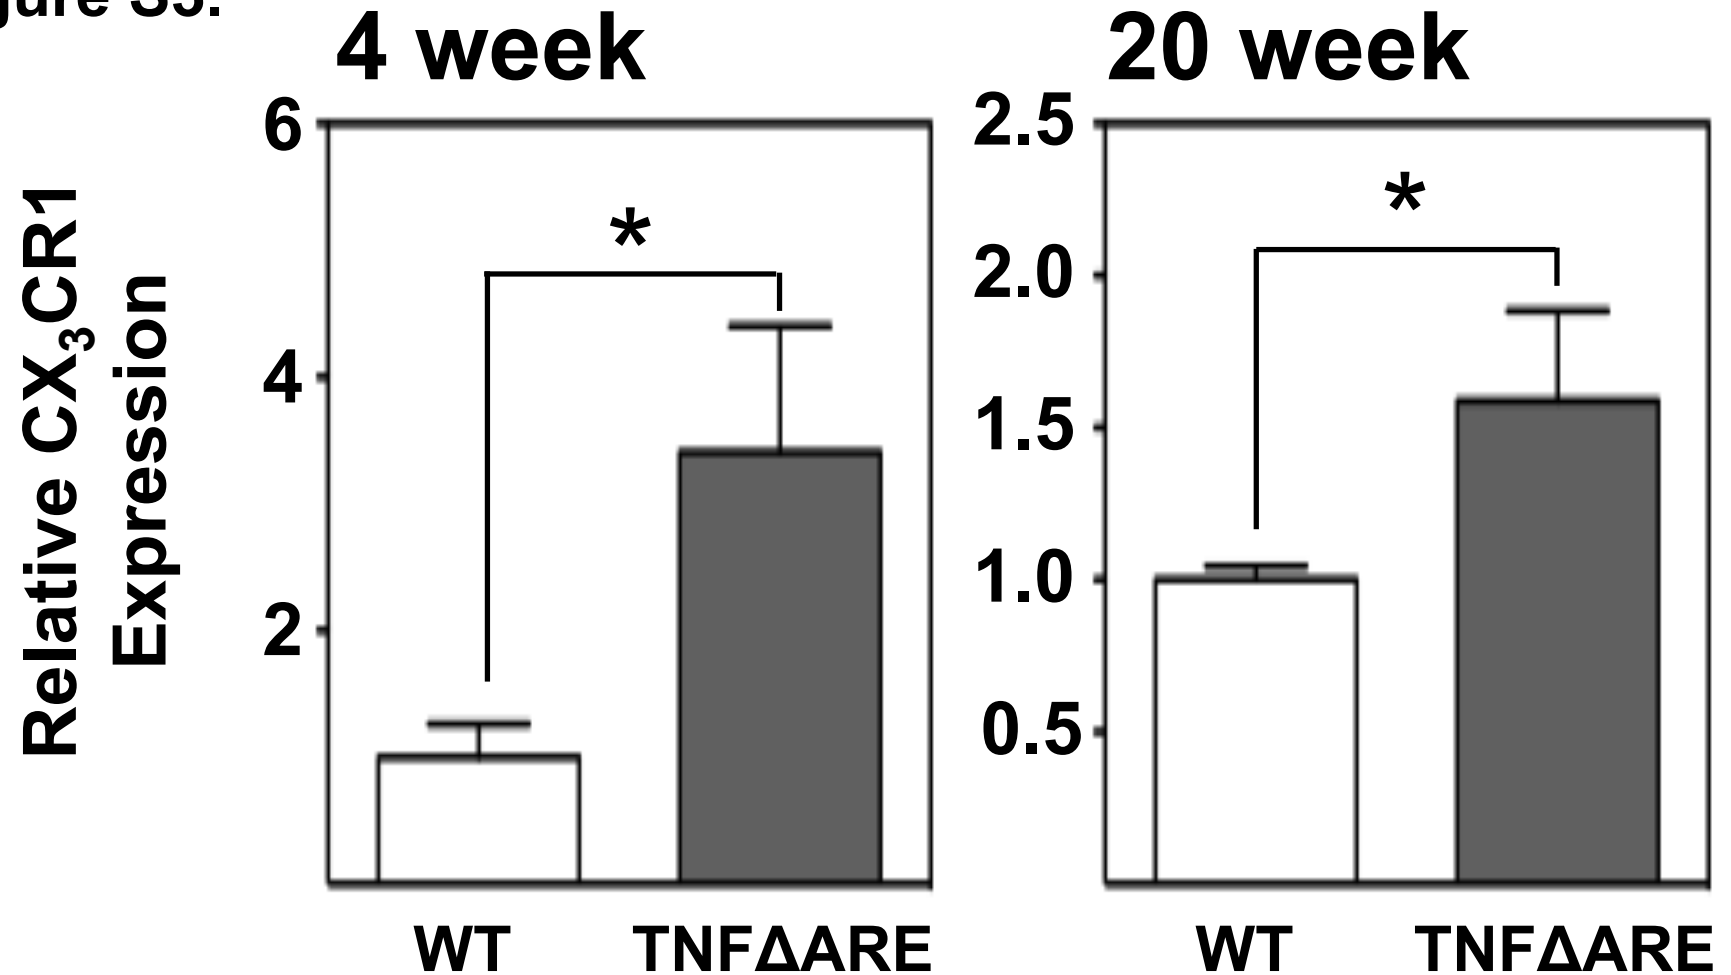

Figure S4.

1  
2  
3  
4  
5  
6  
7  
8  
9  
10  
11  
12  
13  
14  
15  
16  
17  
18  
19  
20  
21  
22  
23  
24  
25  
26  
27  
28  
29  
30  
31  
32  
33  
34  
35  
36  
37  
38  
39  
40  
41  
42  
43  
44  
45  
46  
47  
48  
49

**A**

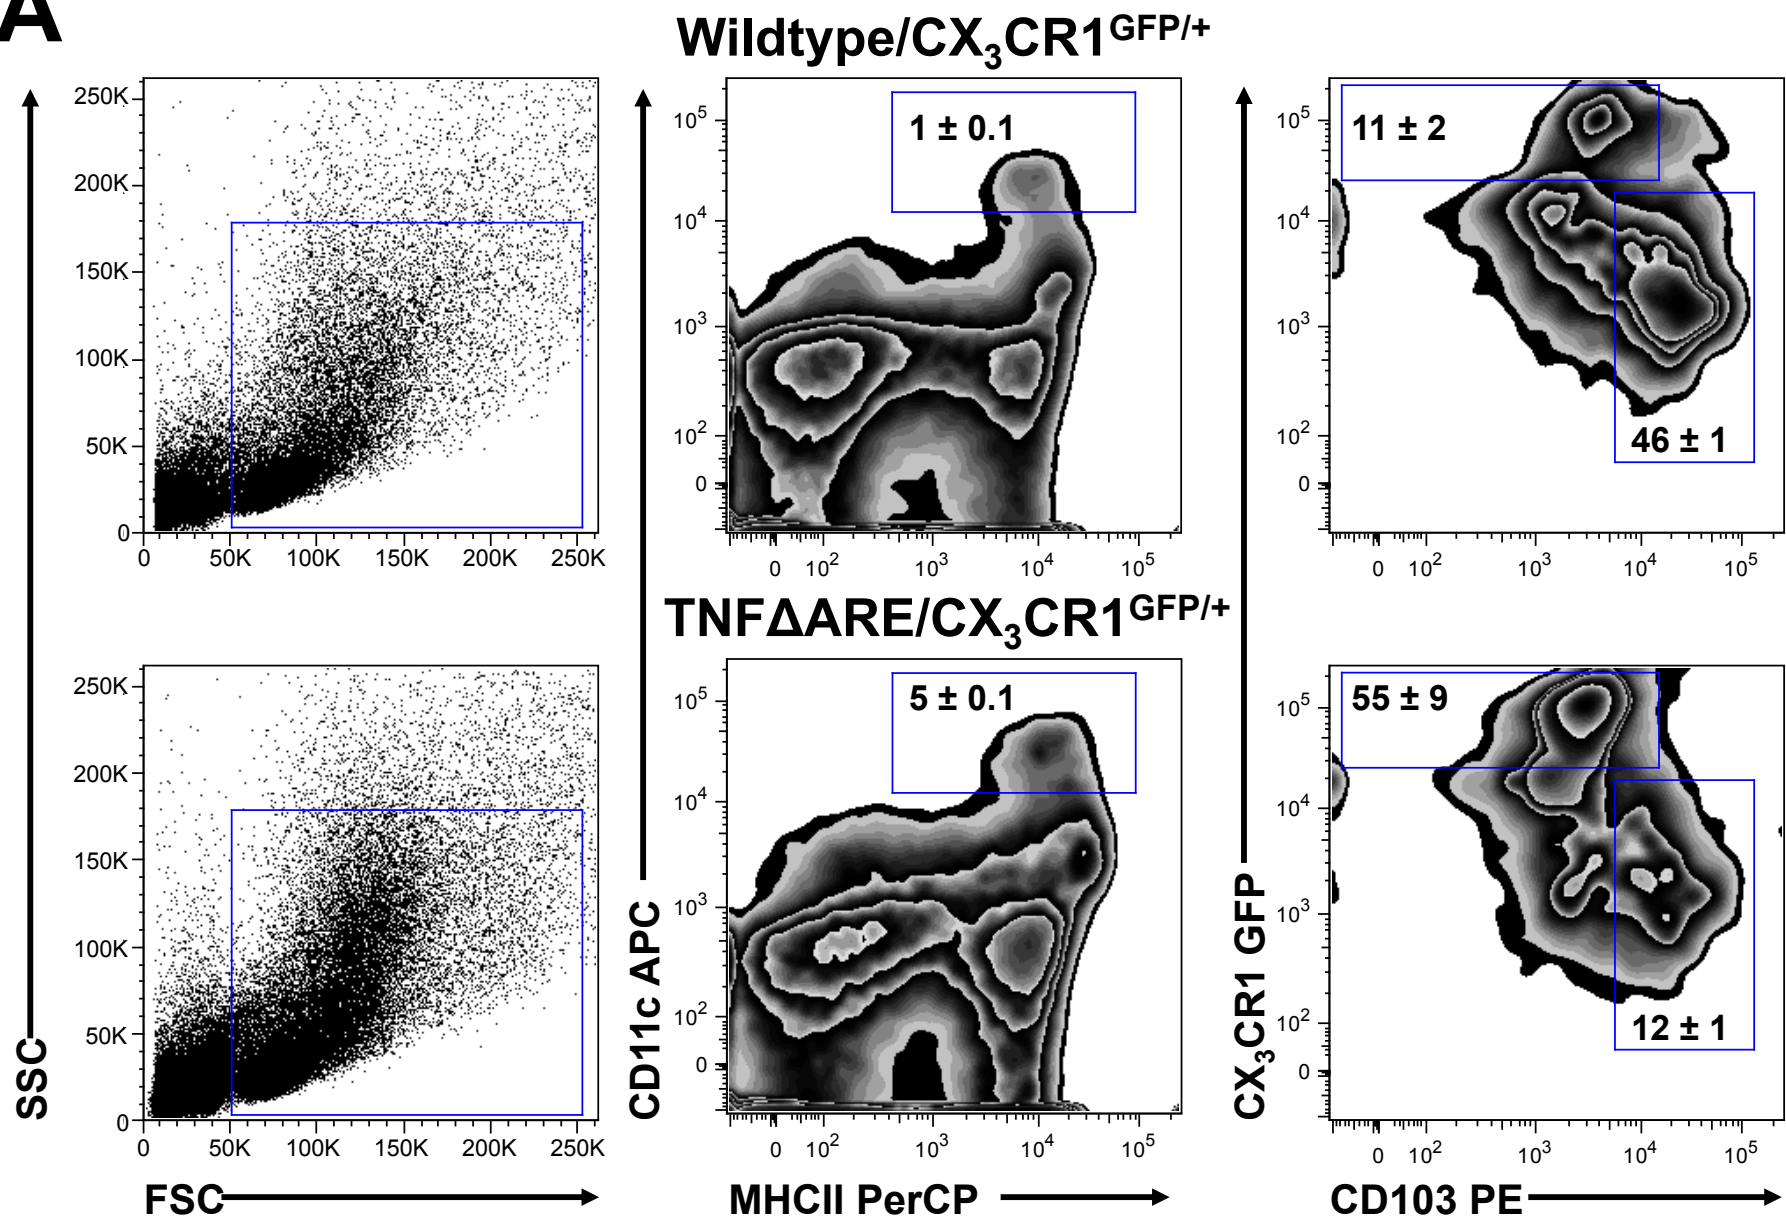

Figure S5.

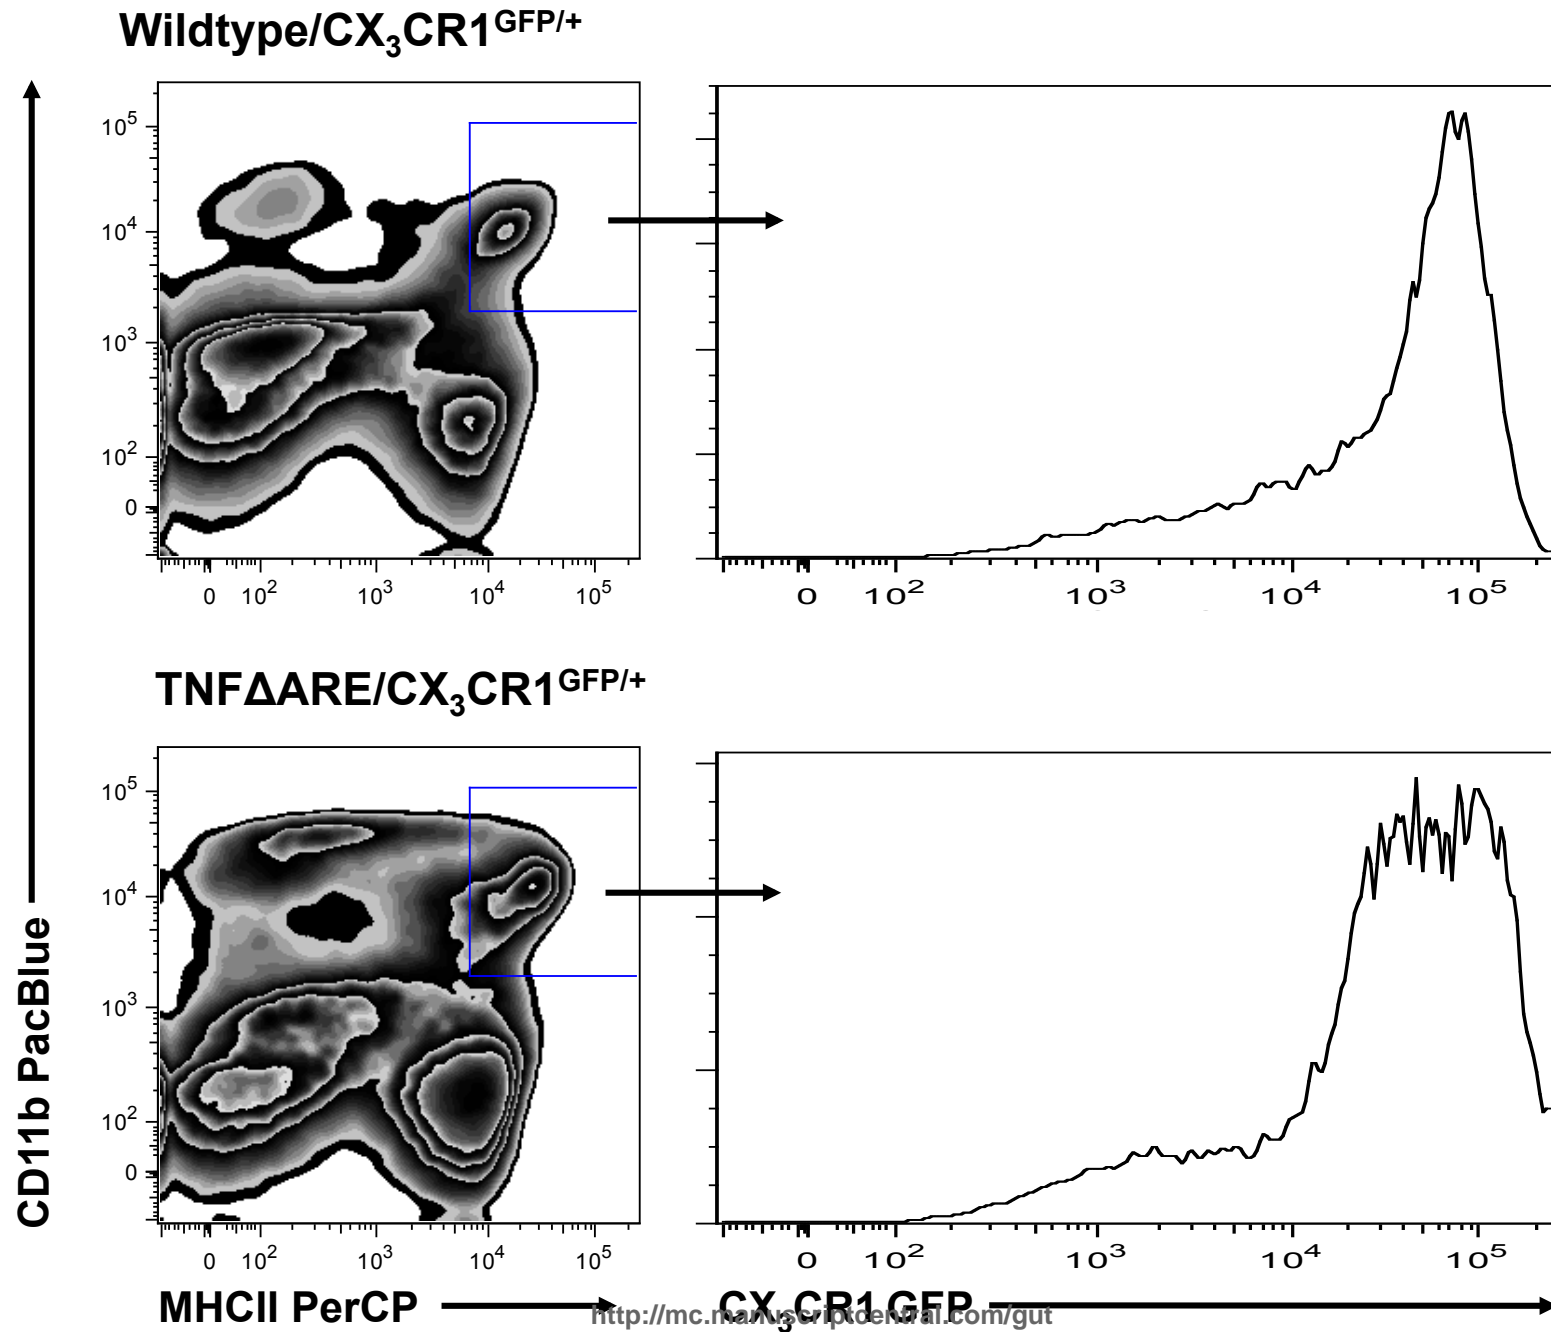

1  
2  
3  
4  
5  
6  
7  
8  
9  
10  
11  
12  
13  
14  
15  
16  
17  
18  
19  
20  
21  
22  
23  
24  
25  
26  
27  
28  
29  
30  
31  
32  
33  
34  
35  
36  
37  
38  
39  
40  
41  
42  
43  
44  
45  
46  
47  
48  
49

Figure S6.

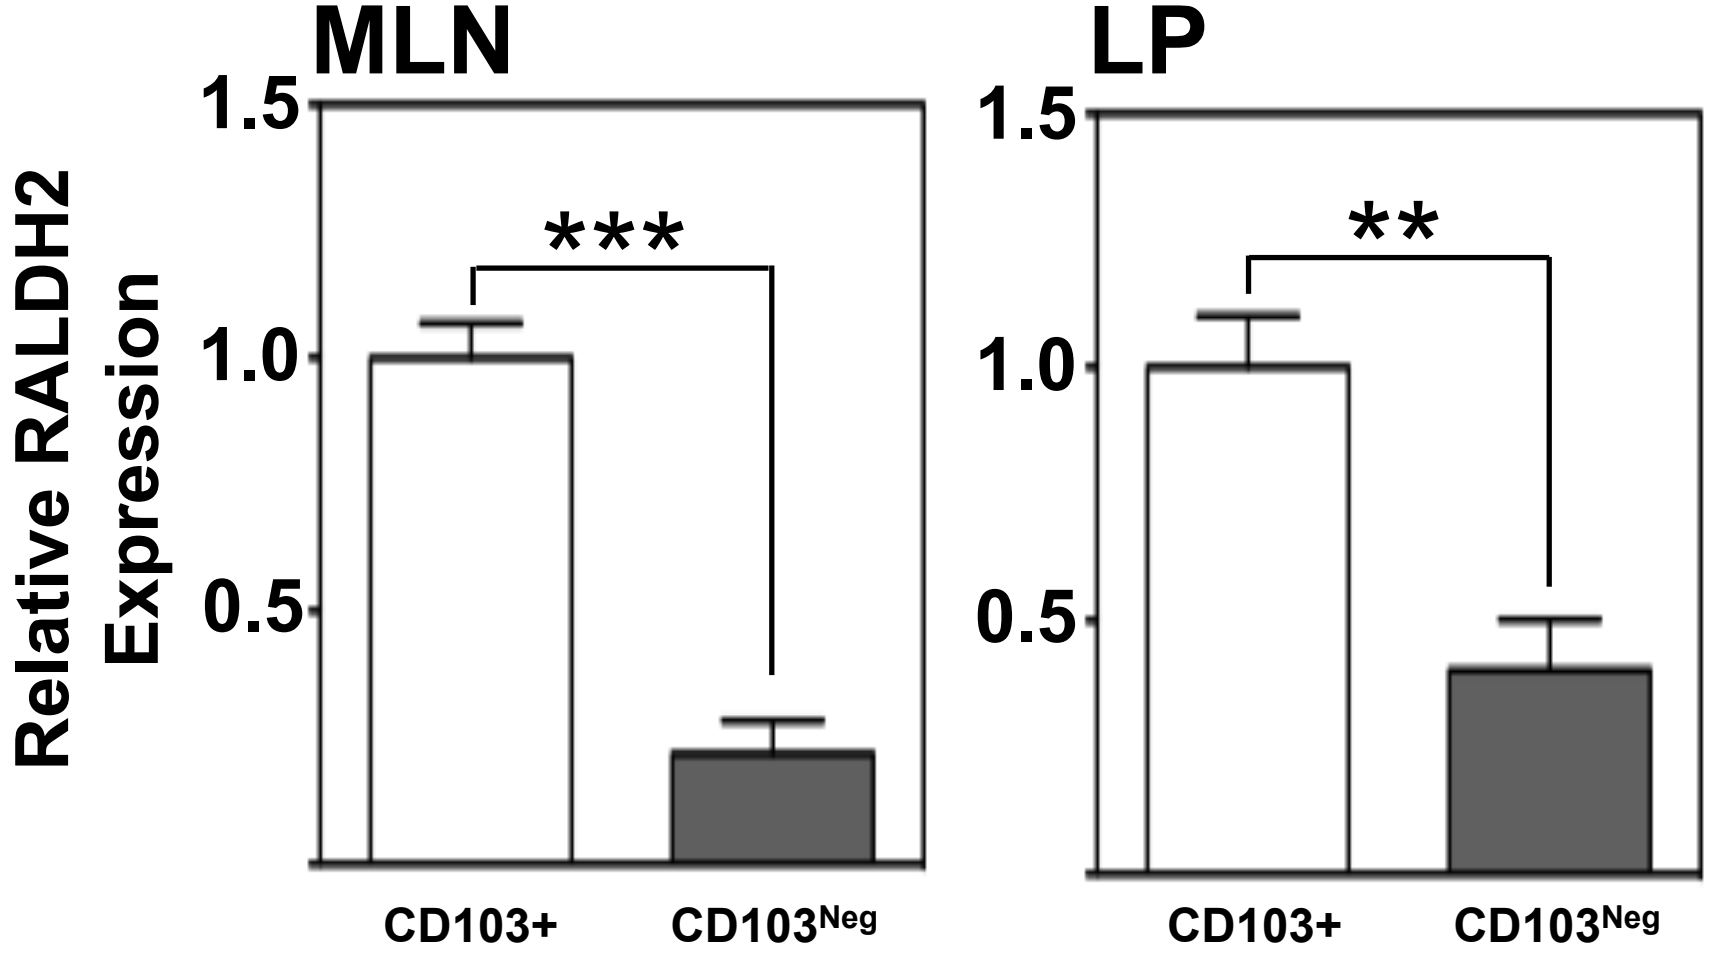



Figure S7.

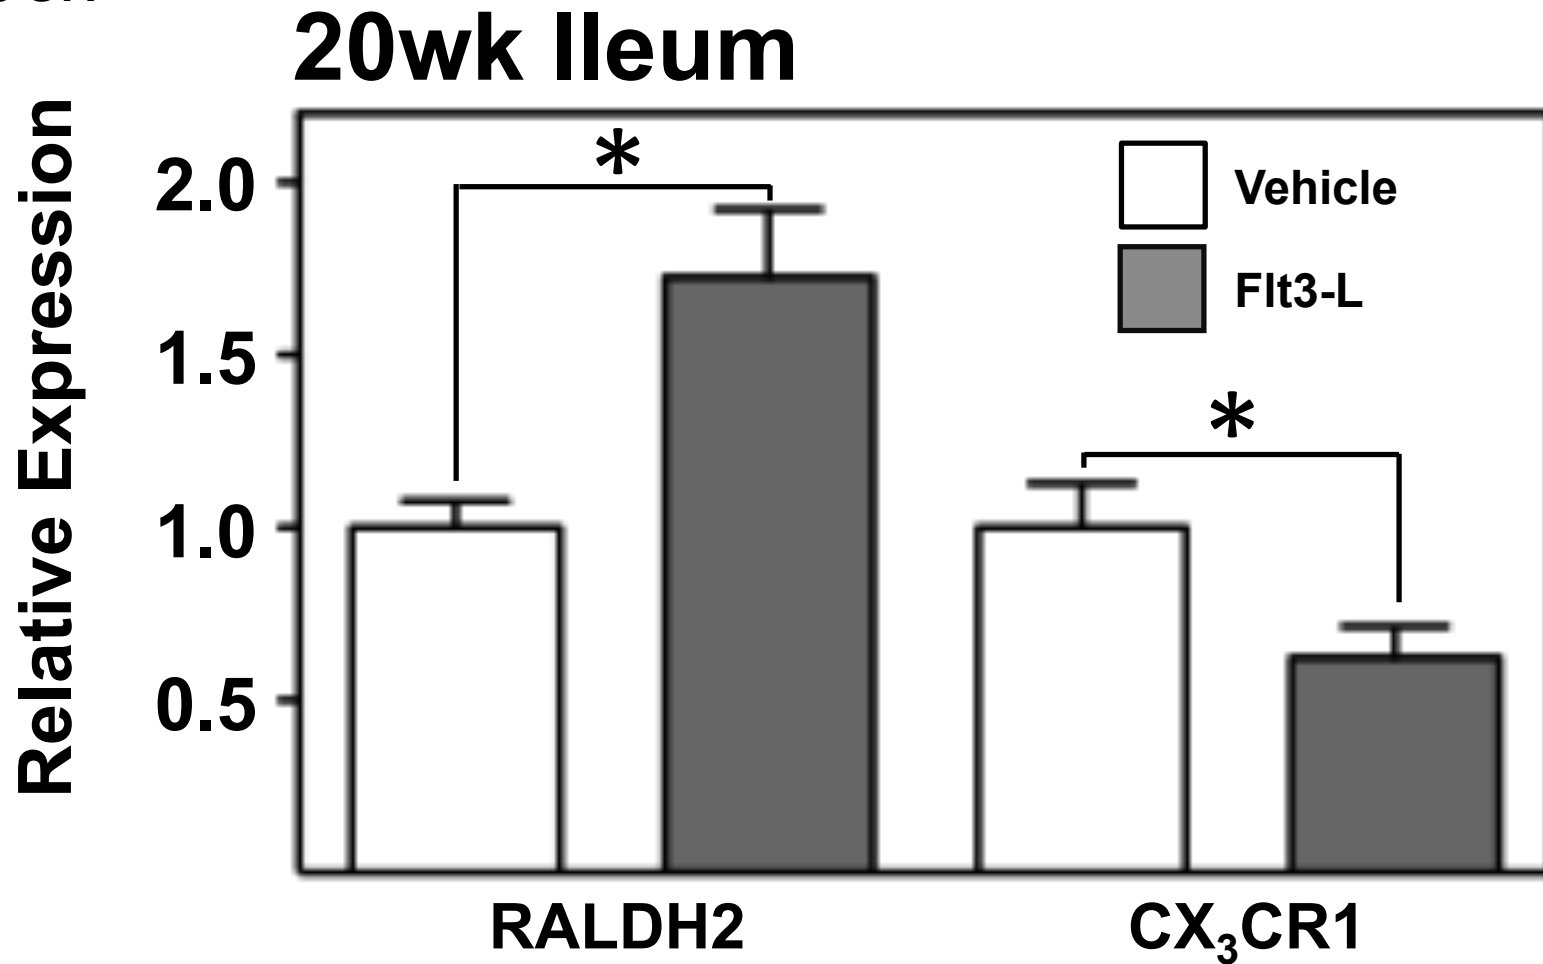

## Figure S8.

A

## Lamina Propria

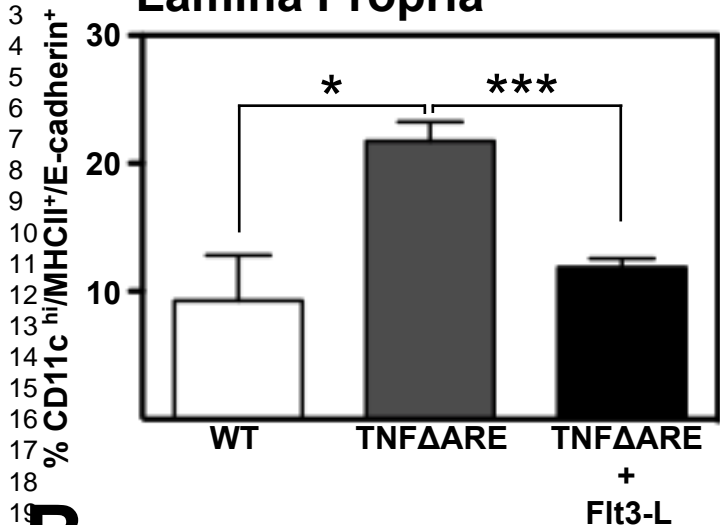

B

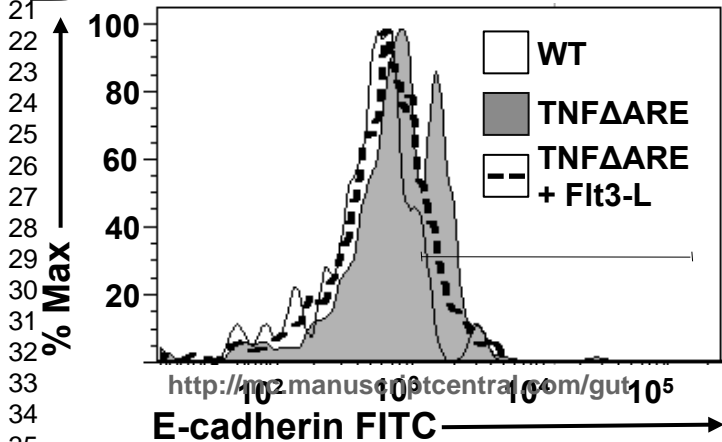

Figure S9

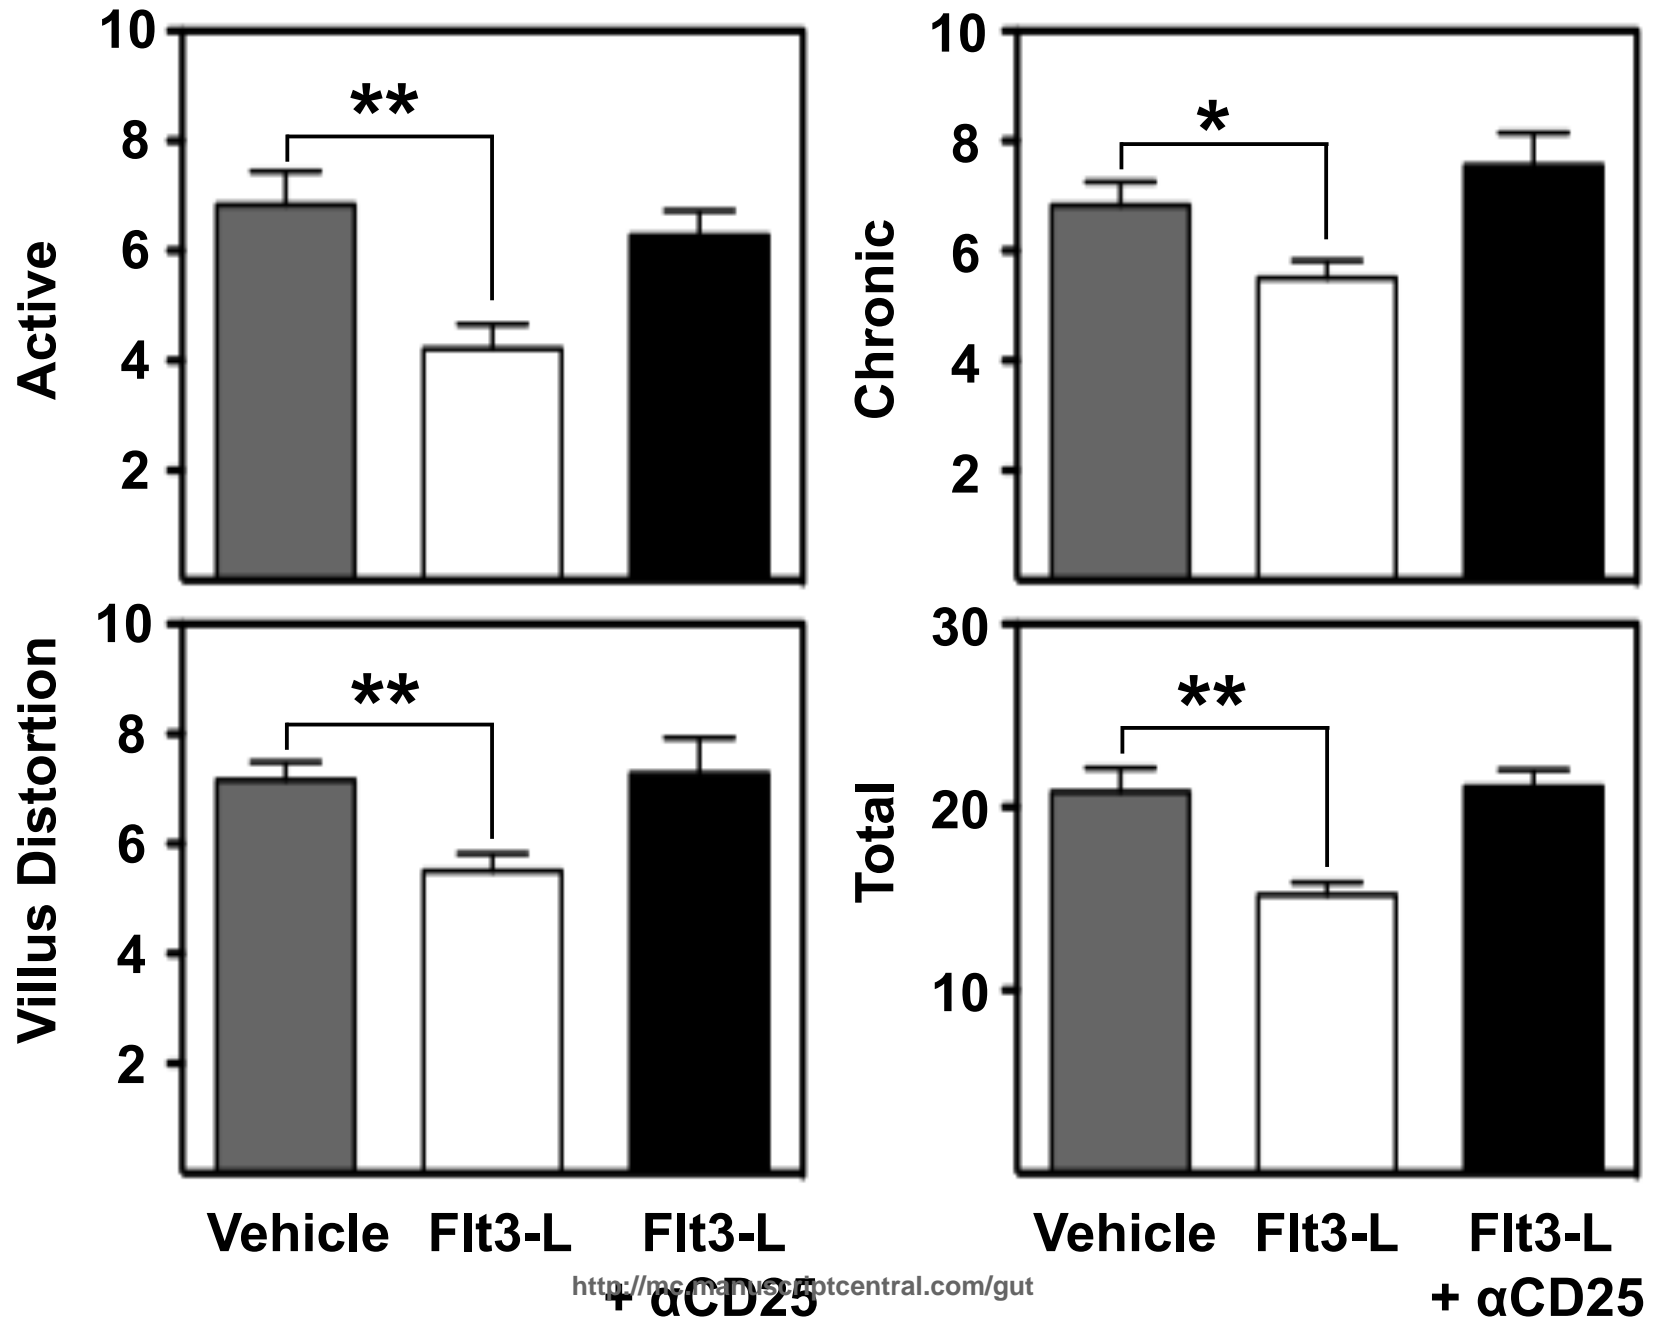

Supplement: NIHMS476986-supplement-01.pdf [file NIHMS476986-supplement-01.pdf]
